# Supplementary material for: Fecal Shedding of Multidrug Resistant Escherichia coli Isolates in Dogs Fed with Raw Meat-Based Diets in Brazil
Source: MDPI journal article supplement (doi:10.3390/antibiotics11040534), 2022-04-17
Supplement: s1 [file s1]

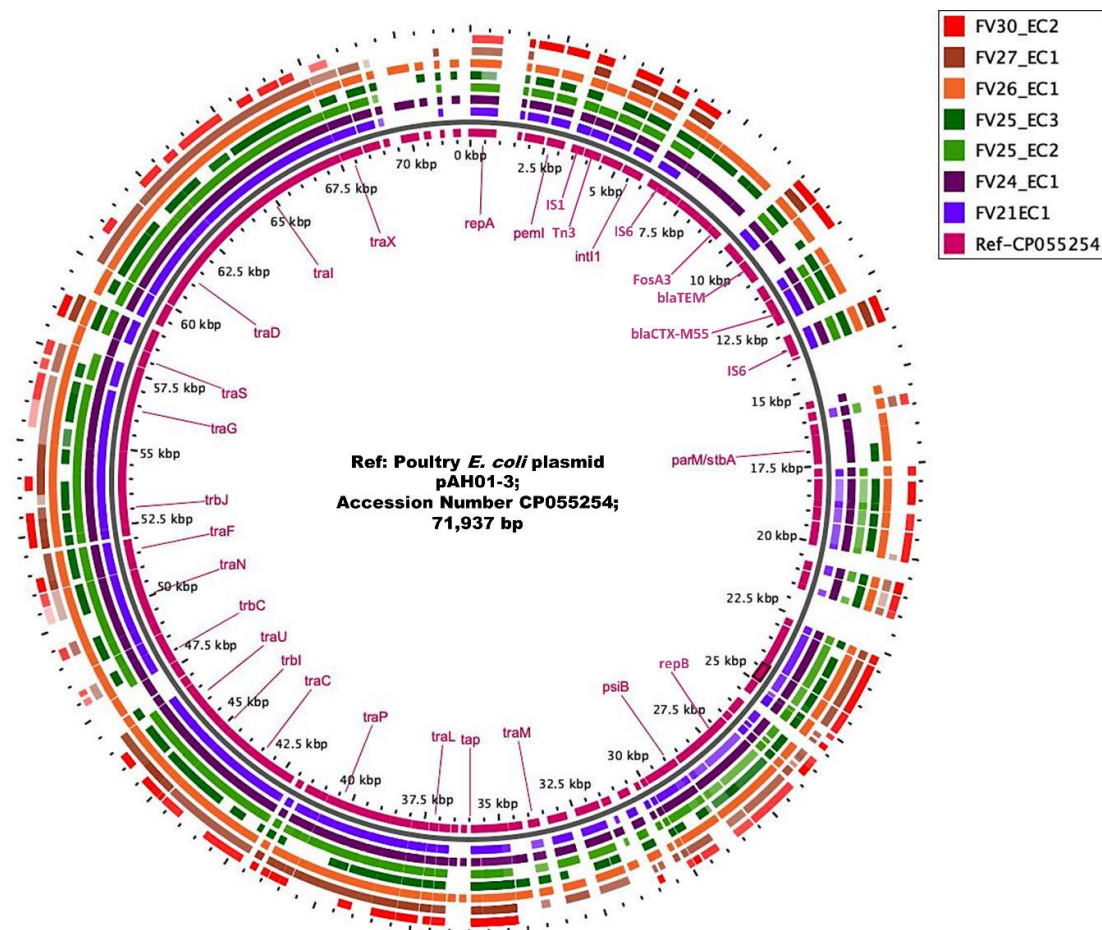

Figure S1. Location of the ESBL genes in the seven *E. coli* strains isolated from dogs fed RMBD around the poultry *E. coli* plasmid (accession number CP055254).
