# Supplementary material for: Fecal Shedding of Multidrug Resistant Escherichia coli Isolates in Dogs Fed with Raw Meat-Based Diets in Brazil
Source: Antibiotics (Basel). 2022 Apr 17;11(4):534. doi: 10.3390/antibiotics11040534 (PMC9029118; doi:10.3390/antibiotics11040534)
Supplement: Supplementary file 1 [file antibiotics-11-00534-s001.zip › Supplementary File 2.xlsx]

## Sheet: SNPs analysis
	FV21EC1	FV24_EC1	FV25_EC2	FV25_EC3	FV26_EC1	FV27_EC1	FV30_EC2	Reference_K12_MG1655	SAMEA7233330_Dog_Italy_2019	SAMN13058694_poultry	SAMN13058695_poultry	SAMN13058696_poultry	SAMN13058698_poultry	SAMN13058699_poultry	SAMN13058700_poultry	SAMN13058713_poultry	SAMN13058714_poultry	SAMN13058715_swine	SAMN13058717_swine	SAMN13058718_human	SAMN13058719_Swine	SAMN13058762_human	SAMN13058763_human	SAMN13058764_human	SAMN13058765_human	SAMN13058766_human	SAMN13058767_human	SAMN13058768_human	SAMN13058770_human	SAMN13495666_Dog_USA_2013	SAMN13495669_Dog_USA_2013	SAMN13495670_Dog_USA_2013	SAMN13495673_Dog_USA_2013
FV21EC1	0	21306	14	26040	5383	25458	19771	3496	5178	34874	34897	14958	21073	21356	21164	33443	34911	35008	19931	21063	34615	35623	21243	25843	37841	34229	34599	35424	37660	38153	21391	34774	21213
FV24_EC1	21306	0	21302	29539	21725	29217	17219	20872	22144	38626	38633	22716	13982	13363	10972	37430	38672	39170	17280	13677	38324	39795	13715	29335	42468	38036	38320	39507	42363	42930	13371	38522	1023
FV25_EC2	14	21302	0	26036	5379	25454	19767	3494	5174	34872	34895	14954	21069	21354	21160	33441	34909	35008	19927	21059	34611	35619	21239	25839	37837	34227	34597	35420	37656	38149	21387	34772	21209
FV25_EC3	26040	29539	26036	0	26318	5789	29610	25613	26268	38755	38758	27838	29739	30080	29698	38013	38854	40116	29698	29891	38472	40291	30005	5617	43662	38238	38401	40153	43586	43933	30051	38640	29755
FV26_EC1	5383	21725	5379	26318	0	25766	20439	5431	6084	35290	35313	15357	21483	21860	21706	33932	35349	35729	20502	21656	35064	36055	21593	26388	38332	34757	35137	35959	38163	38773	21847	35175	21717
FV27_EC1	25458	29217	25454	5789	25766	0	28889	24853	26122	39329	39332	26973	29259	29455	29069	38428	39421	40268	28973	29219	39425	40472	29546	4014	43734	38828	39103	40237	43656	43694	29462	39224	29124
FV30_EC2	19771	17219	19767	29610	20439	28889	0	19739	20924	38494	38492	21475	16342	15936	16824	37339	38523	39044	881	16496	38225	39560	16145	29024	42328	37864	38111	39150	42222	42736	15830	38389	17196
Reference_K12_MG1655	3496	20872	3494	25613	5431	24853	19739	0	4897	33990	34013	14739	20620	20687	20682	32251	34048	34114	19876	20536	33725	34704	20841	25505	36982	33325	33869	34356	36801	37233	20838	33899	20709
SAMEA7233330_Dog_Italy_2019	5178	22144	5174	26268	6084	26122	20924	4897	0	33579	33604	16438	21986	22184	22011	33186	33890	35183	21085	21812	34581	35694	22090	26696	38164	33020	33259	35506	38030	38651	22069	33573	21977
SAMN13058694_poultry	34874	38626	34872	38755	35290	39329	38494	33990	33579	0	33	37677	38689	38616	38487	29034	3430	35817	38480	38648	26333	35882	38536	39539	44592	3170	2249	35713	44522	44304	38595	575	38526
SAMN13058695_poultry	34897	38633	34895	38758	35313	39332	38492	34013	33604	33	0	37681	38698	38621	38494	29025	3399	35810	38486	38656	26322	35893	38551	39540	44599	3195	2226	35724	44543	44325	38604	574	38545
SAMN13058696_poultry	14958	22716	14954	27838	15357	26973	21475	14739	16438	37677	37681	0	22690	22812	22704	36146	37587	37847	21543	22695	37392	38381	22734	27018	41130	36906	37313	38176	41042	41640	22717	37472	22591
SAMN13058698_poultry	21073	13982	21069	29739	21483	29259	16342	20620	21986	38689	38698	22690	0	12609	13743	37606	38729	39145	16370	13126	38627	39845	12832	29454	42517	38197	38478	39318	42415	42994	12724	38583	13773
SAMN13058699_poultry	21356	13363	21354	30080	21860	29455	15936	20687	22184	38616	38621	22812	12609	0	13229	37592	38664	39136	15931	12204	38461	39757	3000	29744	42601	38121	38358	39389	42483	42936	1679	38477	13302
SAMN13058700_poultry	21164	10972	21160	29698	21706	29069	16824	20682	22011	38487	38494	22704	13743	13229	0	37189	38508	38957	16869	13344	38261	39637	13572	29337	42347	38040	38248	39059	42253	42747	13246	38373	10669
SAMN13058713_poultry	33443	37430	33441	38013	33932	38428	37339	32251	33186	29034	29025	36146	37606	37592	37189	0	28955	36180	37401	37379	28794	36822	37661	38763	44319	29224	29265	36174	44249	44338	37754	28835	37144
SAMN13058714_poultry	34911	38672	34909	38854	35349	39421	38523	34048	33890	3430	3399	37587	38729	38664	38508	28955	0	35790	38509	38701	26355	35905	38590	39542	44538	5928	4763	35727	44480	44457	38648	3030	38565
SAMN13058715_swine	35008	39170	35008	40116	35729	40268	39044	34114	35183	35817	35810	37847	39145	39136	38957	36180	35790	0	39065	39071	36064	24225	39051	40469	39285	35562	35569	21832	39218	38519	39112	35701	39051
SAMN13058717_swine	19931	17280	19927	29698	20502	28973	881	19876	21085	38480	38486	21543	16370	15931	16869	37401	38509	39065	0	16456	38234	39521	15986	29098	42276	37918	38106	39266	42172	42717	15775	38377	17184
SAMN13058718_human	21063	13677	21059	29891	21656	29219	16496	20536	21812	38648	38656	22695	13126	12204	13344	37379	38701	39071	16456	0	38389	39743	12479	29366	42435	38098	38370	39070	42338	42976	12159	38532	13465
SAMN13058719_Swine	34615	38324	34611	38472	35064	39425	38225	33725	34581	26333	26322	37392	38627	38461	38261	28794	26355	36064	38234	38389	0	36394	38376	39557	44610	26932	26517	36038	44537	44551	38493	26120	38231
SAMN13058762_human	35623	39795	35619	40291	36055	40472	39560	34704	35694	35882	35893	38381	39845	39757	39637	36822	35905	24225	39521	39743	36394	0	39613	40766	38472	35543	35523	23137	38408	37993	39708	35790	39805
SAMN13058763_human	21243	13715	21239	30005	21593	29546	16145	20841	22090	38536	38551	22734	12832	3000	13572	37661	38590	39051	15986	12479	38376	39613	0	29784	42527	38055	38304	39459	42409	42902	3123	38412	13664
SAMN13058764_human	25843	29335	25839	5617	26388	4014	29024	25505	26696	39539	39540	27018	29454	29744	29337	38763	39542	40469	29098	29366	39557	40766	29784	0	43867	39063	39385	40636	43789	44007	29631	39387	29407
SAMN13058765_human	37841	42468	37837	43662	38332	43734	42328	36982	38164	44592	44599	41130	42517	42601	42347	44319	44538	39285	42276	42435	44610	38472	42527	43867	0	44262	44230	39133	302	21106	42606	44480	42521
SAMN13058766_human	34229	38036	34227	38238	34757	38828	37864	33325	33020	3170	3195	36906	38197	38121	38040	29224	5928	35562	37918	38098	26932	35543	38055	39063	44262	0	3163	35283	44161	43703	38050	3322	37971
SAMN13058767_human	34599	38320	34597	38401	35137	39103	38111	33869	33259	2249	2226	37313	38478	38358	38248	29265	4763	35569	38106	38370	26517	35523	38304	39385	44230	3163	0	35617	44174	44370	38371	2202	38267
SAMN13058768_human	35424	39507	35420	40153	35959	40237	39150	34356	35506	35713	35724	38176	39318	39389	39059	36174	35727	21832	39266	39070	36038	23137	39459	40636	39133	35283	35617	0	39096	38277	39492	35593	39291
SAMN13058770_human	37660	42363	37656	43586	38163	43656	42222	36801	38030	44522	44543	41042	42415	42483	42253	44249	44480	39218	42172	42338	44537	38408	42409	43789	302	44161	44174	39096	0	21096	42502	44406	42391
SAMN13495666_Dog_USA_2013	38153	42930	38149	43933	38773	43694	42736	37233	38651	44304	44325	41640	42994	42936	42747	44338	44457	38519	42717	42976	44551	37993	42902	44007	21106	43703	44370	38277	21096	0	42924	44414	42909
SAMN13495669_Dog_USA_2013	21391	13371	21387	30051	21847	29462	15830	20838	22069	38595	38604	22717	12724	1679	13246	37754	38648	39112	15775	12159	38493	39708	3123	29631	42606	38050	38371	39492	42502	42924	0	38474	13344
SAMN13495670_Dog_USA_2013	34774	38522	34772	38640	35175	39224	38389	33899	33573	575	574	37472	38583	38477	38373	28835	3030	35701	38377	38532	26120	35790	38412	39387	44480	3322	2202	35593	44406	44414	38474	0	38425
SAMN13495673_Dog_USA_2013	21213	1023	21209	29755	21717	29124	17196	20709	21977	38526	38545	22591	13773	13302	10669	37144	38565	39051	17184	13465	38231	39805	13664	29407	42521	37971	38267	39291	42391	42909	13344	38425	0
min: 14 max: 44610
Percentage of reference genome covered by all isolates: 71.0354416918804
3297218 positions was found in all analyzed genomes.
Size of reference genome: 4641652
